# Supplementary material for: DCTN1 Binds to TDP-43 and Regulates TDP-43 Aggregation
Source: Int J Mol Sci. 2021 Apr 13;22(8):3985. doi: 10.3390/ijms22083985 (PMC8070438; doi:10.3390/ijms22083985)
Supplement: Supplementary file 1 [file ijms-22-03985-s001.zip]

Archive with 7 entries (7 files):
- Movie S1-031621.mp4
- Movie S2-031821.mp4
- Movie S3-031821.mp4
- Movie S4-031821.mp4
- Movie S5-031821.mp4
- Movie S6-031821.mp4
- ijms-1172969-SupMaterials-041221-2F.pdf
